# Supplementary material for: Evaluation of Met-Val-Lys as a Renal Brush Border Enzyme-Cleavable Linker to Reduce Kidney Uptake of 68Ga-Labeled DOTA-Conjugated Peptides and Peptidomimetics
Source: MDPI journal article supplement (doi:10.3390/molecules25173854), 2020-08-25
Supplement: s1 [file s1]

**Supplemental Table 1:** HPLC conditions and retention times for the purification of DOTA-conjugated peptides and peptidomimetics using the semipreparative column (Luna C18, 5  $\mu$ m particle size, 100 Å pore size, 250 x 10 mm).

| Ligand                        | HPLC conditions                                                             | Retention time (min) |
|-------------------------------|-----------------------------------------------------------------------------|----------------------|
| DOTA-AmBz-Met-OH              | 17% CH <sub>3</sub> CN and 0.1% TFA in H <sub>2</sub> O; flow rate: 4.5 min | 10.2                 |
| DOTA-AmBz-MVK(Ac)-OH          | 16% CH <sub>3</sub> CN and 0.1% TFA in H <sub>2</sub> O; flow rate: 4.5 min | 14.1                 |
| DOTA-AmBz-MVK(HTK01166)-OH    | 27% CH <sub>3</sub> CN and 0.1% TFA in H <sub>2</sub> O; flow rate: 4.5 min | 12.6                 |
| DOTA-AmBz-M(O)VK(HTK01166)-OH | 26% CH <sub>3</sub> CN and 0.1% TFA in H <sub>2</sub> O; flow rate: 4.5 min | 8.3                  |

**Supplemental Table 2:** HPLC conditions and retention times for the purification of nonradioactive Ga-complexed DOTA-conjugated peptides and peptidomimetics using the semipreparative column (Luna C18, 5  $\mu$ m particle size, 100 Å pore size, 250 x 10 mm).

| Ligand                           | HPLC conditions                                                             | Retention time (min) |
|----------------------------------|-----------------------------------------------------------------------------|----------------------|
| Ga-DOTA-AmBz-Met-OH              | 17% CH <sub>3</sub> CN and 0.1% TFA in H <sub>2</sub> O; flow rate: 4.5 min | 10.5                 |
| Ga-DOTA-AmBz-MVK(Ac)-OH          | 18% CH <sub>3</sub> CN and 0.1% TFA in H <sub>2</sub> O; flow rate: 4.5 min | 11.2                 |
| Ga-DOTA-AmBz-MVK(HTK01166)-OH    | 26% CH <sub>3</sub> CN and 0.1% TFA in H <sub>2</sub> O; flow rate: 4.5 min | 8.0                  |
| Ga-DOTA-AmBz-M(O)VK(HTK01166)-OH | 26% CH <sub>3</sub> CN and 0.1% TFA in H <sub>2</sub> O; flow rate: 4.5 min | 10.8                 |

**Supplemental Table 3:** HPLC conditions and retention times for the purification/QC of <sup>68</sup>Ga-labeled DOTA-conjugated peptides and peptidomimetics using the semipreparative column - Luna C18, 5 μm particle size, 100 Å pore size, 250 x 10 mm; the analytical (QC) column - Luna C18, 5 μm particle size, 100 Å pore size, 250 x 4.6 mm.

| Ligand                                              | HPLC conditions |                                                                              | Retention time (min) |
|-----------------------------------------------------|-----------------|------------------------------------------------------------------------------|----------------------|
| [ <sup>68</sup> Ga]Ga-DOTA-AmBz-MVK(Ac)-OH          | Semi-prep       | 16% CH <sub>3</sub> CN and 0.1% TFA in H <sub>2</sub> O; flow rate: 4.5 min  | 24.3                 |
|                                                     | QC              | 18% CH <sub>3</sub> CN and 0.1% TFA in H <sub>2</sub> O; flow rate: 2.0 min  | 7.0                  |
| [ <sup>68</sup> Ga]Ga-DOTA-AmBz-MVK(HTK01166)-OH    | Semi-prep       | 26% CH <sub>3</sub> CN and 0.1% TFA in H <sub>2</sub> O; flow rate: 4.5 min  | 26.1                 |
|                                                     | QC              | 28% CH <sub>3</sub> CN and 0.1% TFA in H <sub>2</sub> O; flow rate: 2.0 min  | 8.2                  |
| [ <sup>68</sup> Ga]Ga-DOTA-AmBz-M(O)VK(HTK01166)-OH | Semi-prep       | 23% CH <sub>3</sub> CN and 0.1% COOH in H <sub>2</sub> O; flow rate: 4.5 min | 15.7                 |
|                                                     | QC              | 24% CH <sub>3</sub> CN and 0.1% COOH in H <sub>2</sub> O; flow rate: 2.0 min | 6.2                  |
